# Supplementary material for: Rational design and bioimaging application of water-soluble Fe3+ fluorescent probes
Source: Royal Society of Chemistry journal article supplement (doi:10.1039/d0nj06253g), 2021-01-01
Supplement: d0nj06253g1.pdf [file d0nj06253g1.pdf]

## Rational design and bioimaging application of water-solubility Fe<sup>3+</sup> fluorescent probe

Jianwen Qiu,<sup>a</sup> Chunli Zhong,<sup>a</sup> Meng Liu,<sup>a</sup> Yaofeng Yuan,<sup>b</sup> Hu Zhu,<sup>a,c\*</sup> and Yong Gao<sup>a\*</sup>

a. College of Chemistry and Materials Science, Fujian Normal University, Fuzhou 350117, China;

b. Department of Chemistry, Fuzhou University, Fuzhou 350108, China;

c. Engineering Research Center of Industrial Biocatalysis, Fujian Province Higher Education Institutes, Key Laboratory of OptoElectronic Science and Technology for Medicine of Ministry of Education, Fujian Normal University, Fuzhou, 350117, China

\*Corresponding authors

E-mail addresses: zhuhu@fjnu.edu.cn (H Zhu); gaoyong@fjnu.edu.cn (Y Gao)

### 1. Supplementary Spectra and chart

**Table S1:** Comparison of fluorescent probes for Fe (III) ions with similar structures.

| Probes                                                                              | Medium                                               | Limit of detection (μM) | Reference                                                      |
|-------------------------------------------------------------------------------------|------------------------------------------------------|-------------------------|----------------------------------------------------------------|
| 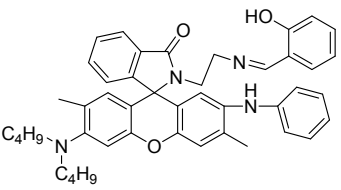 | CH <sub>3</sub> CN                                   | -                       | Molecular Crystals and Liquid Crystals, 2009, 504(1): 155-163. |
|  | H <sub>2</sub> O/CH <sub>3</sub> CN<br>(95 : 5, v/v) | -                       | Chemical Communications, 2010, 46(9): 1407-1409.               |
|  | CH <sub>3</sub> OH/HEPES<br>buffer (1:1, v/v)        | -                       | RSC Advances, 2013, 3(24): 9189-9192.                          |
|  | EtOH                                                 | -                       | Inorganic Chemistry Communications, 2013, 35 : 255-259.        |

|                                                                                     |                                                   |                       |                                                               |
|-------------------------------------------------------------------------------------|---------------------------------------------------|-----------------------|---------------------------------------------------------------|
| 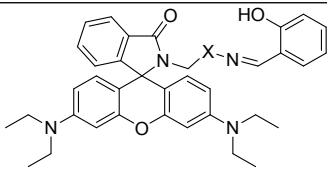   | CH <sub>3</sub> CN/H <sub>2</sub> O<br>(1:1, v/v) | $2.0 \times 10^{-2}$  | Sensors and Actuators B-<br>chemical, 2012,174 :<br>231-236.  |
|    | MeOH/H <sub>2</sub> O<br>(1:1, v/v)               | $1.9 \times 10^{-2}$  | Sensors and Actuators B:<br>Chemical, 2016, 223: 101-<br>113. |
|    | THF/H <sub>2</sub> O (v/v,<br>3/7)                | $1.83 \times 10^{-1}$ | Sensors and Actuators B:<br>Chemical, 2016, 224: 592-<br>599. |
|   | H <sub>2</sub> O/methanol<br>= 3:7 (v/v)          | $4.04 \times 10^{-3}$ | Sensors and Actuators B:<br>Chemical, 2017, 246: 518-<br>534. |
|  | methanol/H <sub>2</sub> O<br>(1:1, v/v)           | $2.9 \times 10^{-1}$  | New Journal of Chemistry,<br>2017, 41(16): 8359-8369.         |
|  | MeOH/HEPES<br>buffer(1:1, v/v)                    | $8.7 \times 10^{-2}$  | Dalton Transactions, 2018,<br>47(10): 3378-3387.              |
|  | CH <sub>3</sub> OH/H <sub>2</sub> O<br>(1:9, v/v) | $3 \times 10^{-2}$    | Anal. Methods, 2019, 11,<br>794-799                           |

|                                                                                   |                                                           |                      |                                                     |
|-----------------------------------------------------------------------------------|-----------------------------------------------------------|----------------------|-----------------------------------------------------|
| 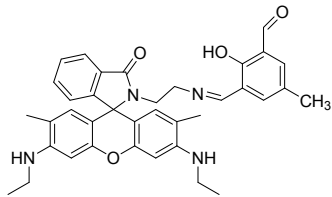 | MeOH /water<br>(9:1, v/v)                                 | $1.4 \times 10^{-2}$ | Dalton Transactions, 2019,48:<br>17594–17604.       |
|  | CH <sub>3</sub> CN and<br>HEPES<br>solution (1:1,<br>v:v) | $8.1 \times 10^{-3}$ | Journal of fluorescence,<br>2019, 29(5): 1221-1226. |
|  | water                                                     | 5.2                  | This work                                           |

**Table S2:** Photophysical properties on the **T1** and **T2**

|           | $\lambda_{\text{abs}}$ (nm) | $\lambda_{\text{em}}$ (nm) | $\Delta\lambda$ (nm) | $\epsilon$ (M <sup>-1</sup> cm <sup>-1</sup> ) | $\Phi^a$ | $\Phi^b$ |
|-----------|-----------------------------|----------------------------|----------------------|------------------------------------------------|----------|----------|
| <b>T1</b> | 563                         | 590                        | 27                   | $6.5 \times 10^3$                              | 0.01     | 0.47     |
| <b>T2</b> | 565                         | 587                        | 22                   | $1.3 \times 10^3$                              | 0.05     | 0.12     |

a: only probe (10  $\mu\text{M}$ )

b: probe (10  $\mu\text{M}$ ) + Fe<sup>3+</sup> (40  $\mu\text{M}$ )

\*  $\Phi$  was relevant to rhodamine B,  $\Phi = 0.69$  in MeOH

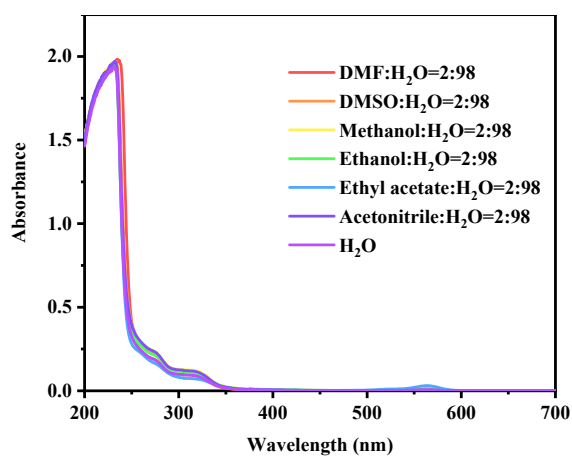

**Figure S1.** UV-vis absorption spectra of **T1** (10  $\mu\text{M}$ ) in different solvents.

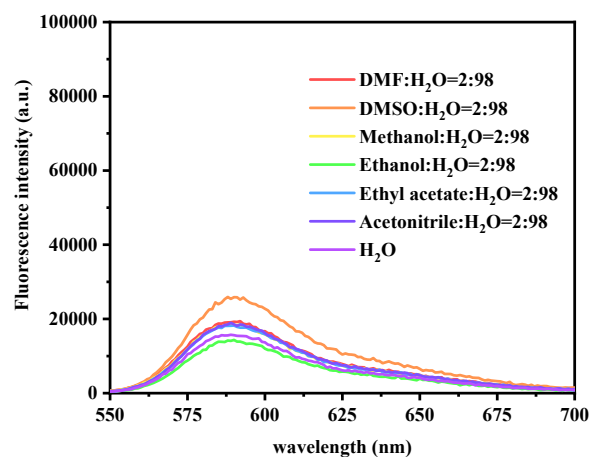

**Figure S2.** Fluorescence emission spectra of **T1** (10  $\mu$ M) in different solvents.

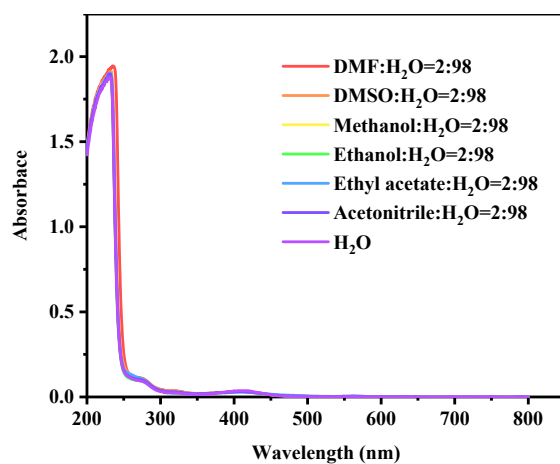

**Figure S3.** The UV-vis absorption spectra of **T2** (10  $\mu$ M) in different solvents.

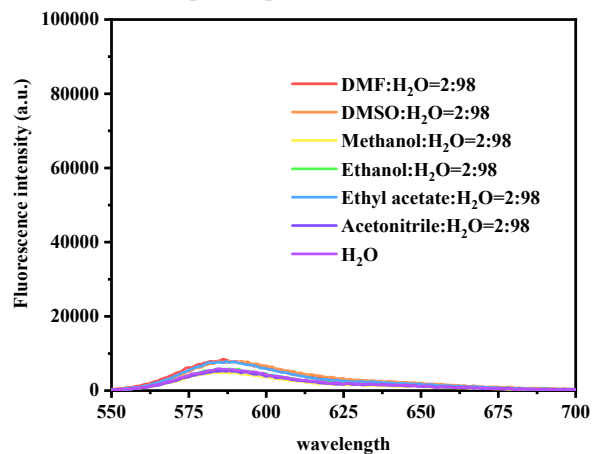

**Figure S4.** Fluorescence emission spectra of **T2** (10  $\mu$ M) in different solvents.

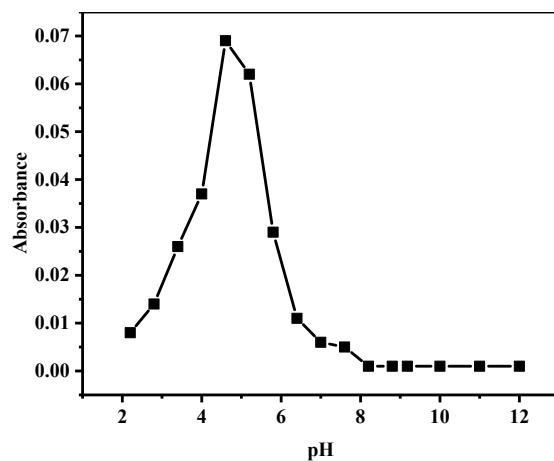

**Figure S5.** UV-vis absorption changes of T1 (10 μM) at 570 nm at various pH values (pH 2 to 12).

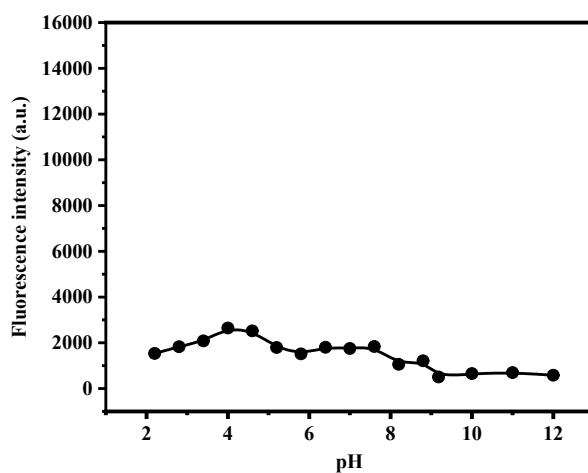

**Figure S6.** Emission changes of T1 (10 μM, λ<sub>ex</sub> = 570 nm) at 590 nm at various pH values (pH 2 to 12).

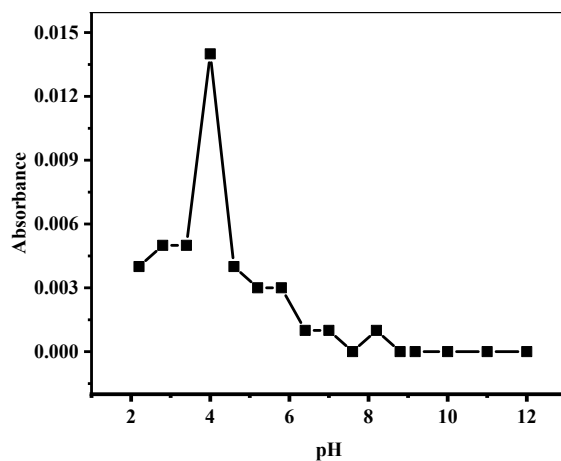

**Figure S7.** UV-vis absorption changes of T2 (10 μM) at 570 nm at various pH values (pH 2 to 12).

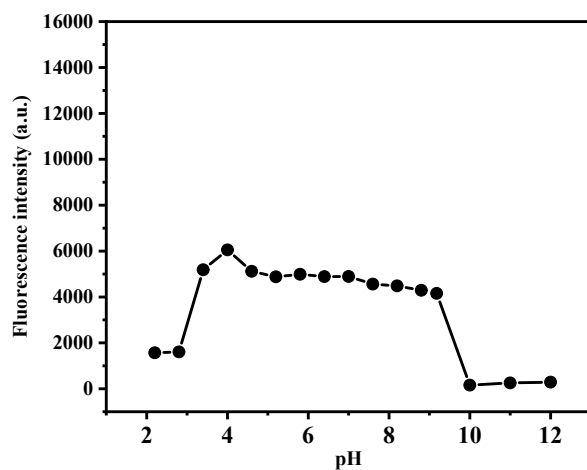

**Figure S8.** Emission changes of **T2** (10  $\mu\text{M}$ ,  $\lambda_{\text{exc}} = 570 \text{ nm}$ ) at 590 nm at various pH values (pH 2 to 12).

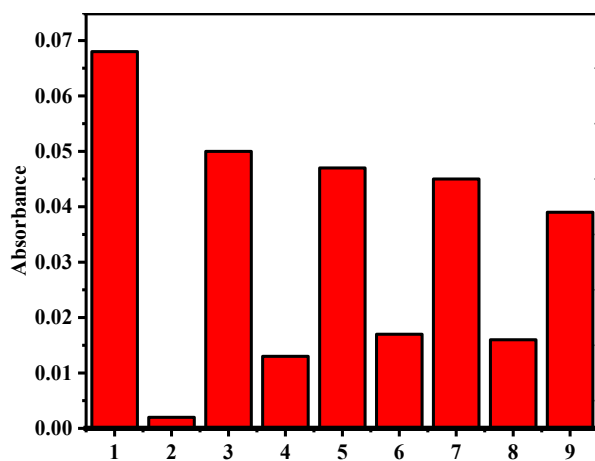

**Figure S9.** UV-vis absorbance at 560 nm of **T1** (10  $\mu\text{M}$ ) in water (pH=7.4) solution with the alternate adding of  $\text{Fe}^{3+}$  (20  $\mu\text{M}$ ) and EDTA (20  $\mu\text{M}$ ).

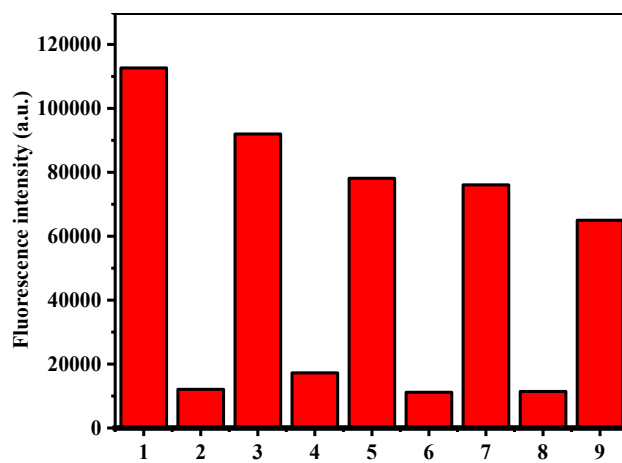

**Figure S10.** Fluorescence emission intensity at 590 nm of **T1** (10  $\mu\text{M}$ ) in water (pH=7.4) solution with the alternate adding of  $\text{Fe}^{3+}$  (20  $\mu\text{M}$ ) and EDTA (20  $\mu\text{M}$ ).

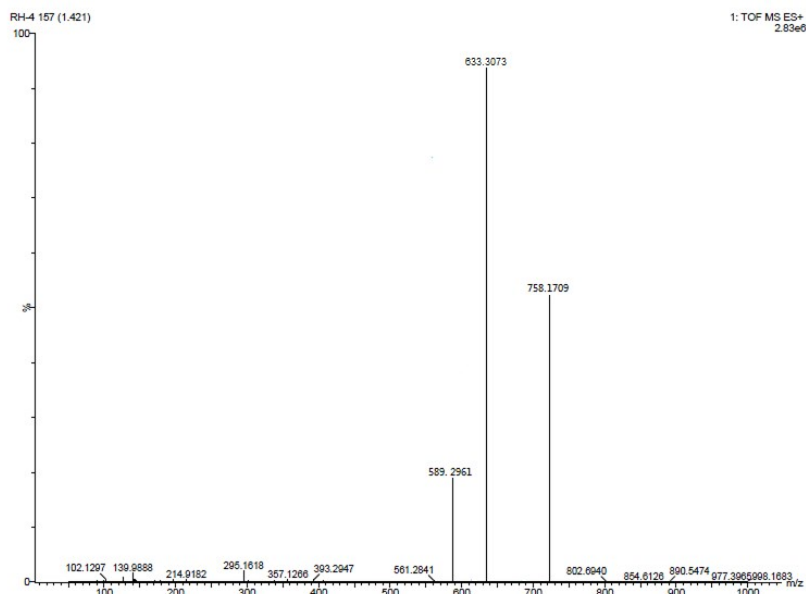

**Figure S11.** ESI-MS of **T1-Fe<sup>3+</sup>** complex. ESI-mass:  $m/z = 633.3073$  [**T1**+1],  $m/z = 758.1709$  [**T1**+  $\text{Fe}^{3+}+2\text{Cl}^-$ ]<sup>+</sup>.

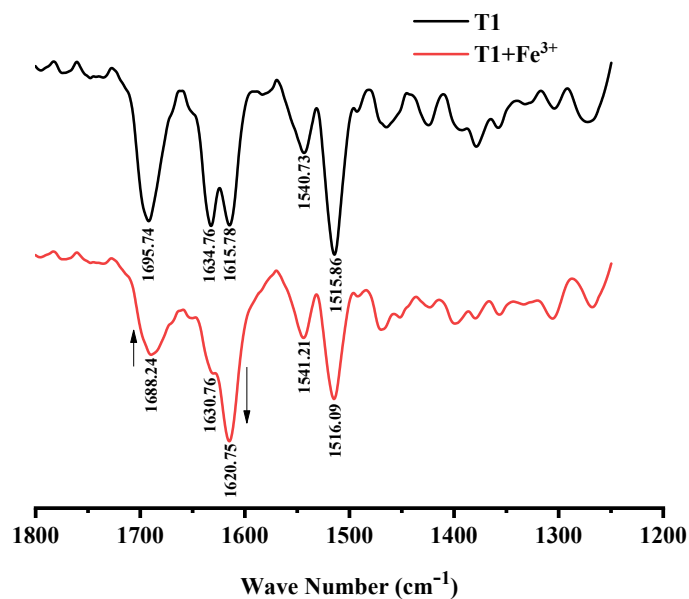

**Figure S12.** IR spectra of **T1** (2 mM) alone and upon addition of 1 mM  $\text{Fe}^{3+}$  ions. Upward arrow shows the decrement in the intensity of spitolactam ring 'C=O' and downward arrow shows the increment in the intensity of metal bound ring opened 'C-O'.

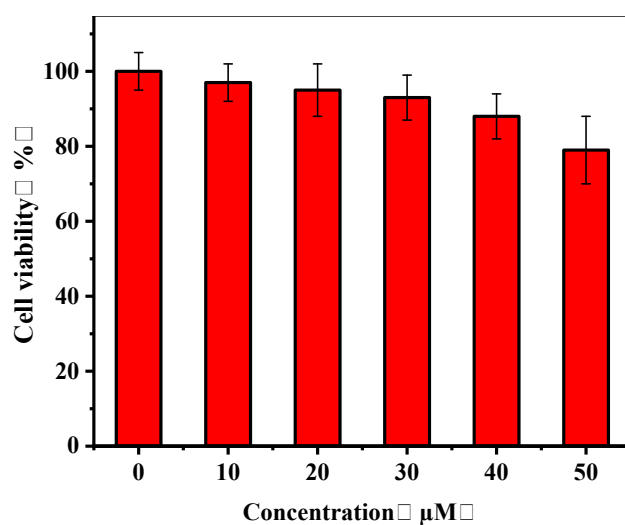

**Fig. S13** Cell viability of HeLa cells treated with different concentrations of **T1** (0-50  $\mu\text{M}$ ) for 24 h.

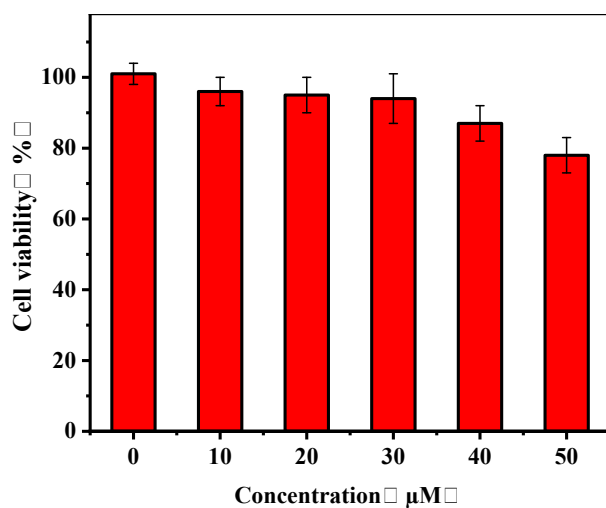

**Fig. S14** Cell viability of HeLa cells treated with different concentrations of **T2** (0-50  $\mu\text{M}$ ) for 24 h.



## 2. $^1\text{H}$ NMR, $^{13}\text{C}$ NMR and MS charts

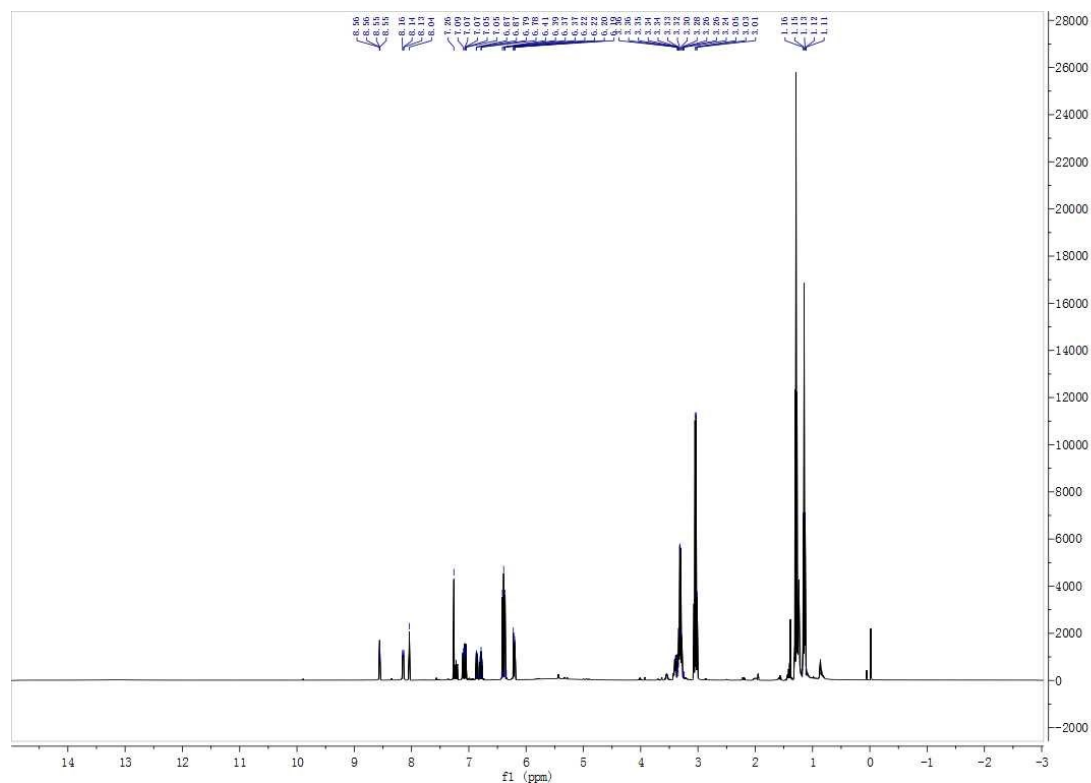

Figure S15.  $^1\text{H}$  NMR of T1 in  $\text{CDCl}_3$  ( $\delta = 7.26$ ).

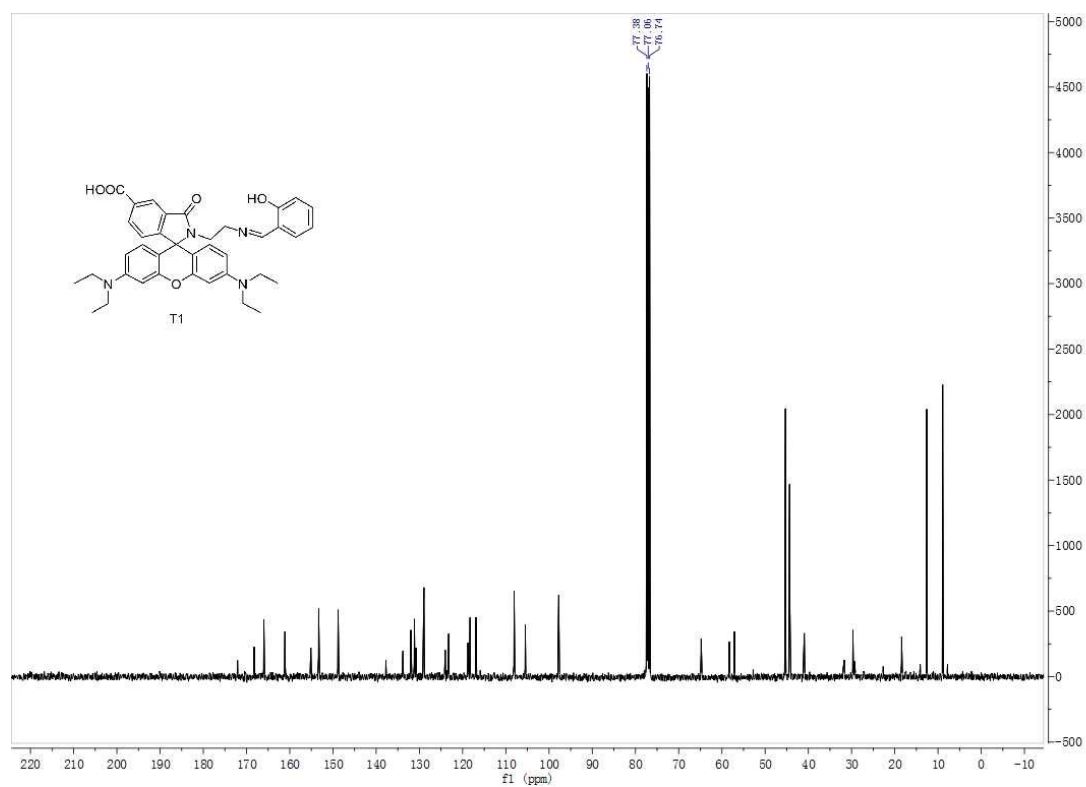

Figure S16.  $^{13}\text{C}$  NMR spectra of T1 in  $\text{CDCl}_3$  ( $\delta = 77.23$ ).



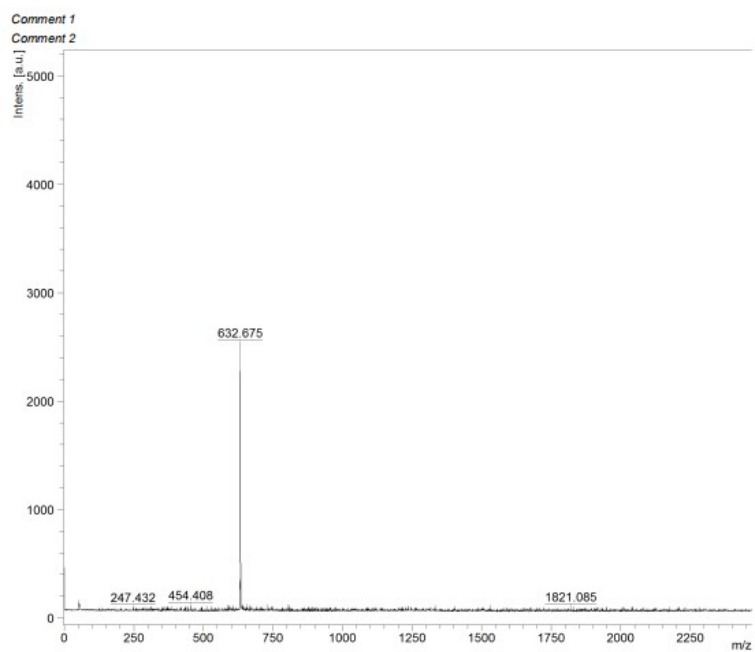

**Figure S19.** MS spectra of T1.

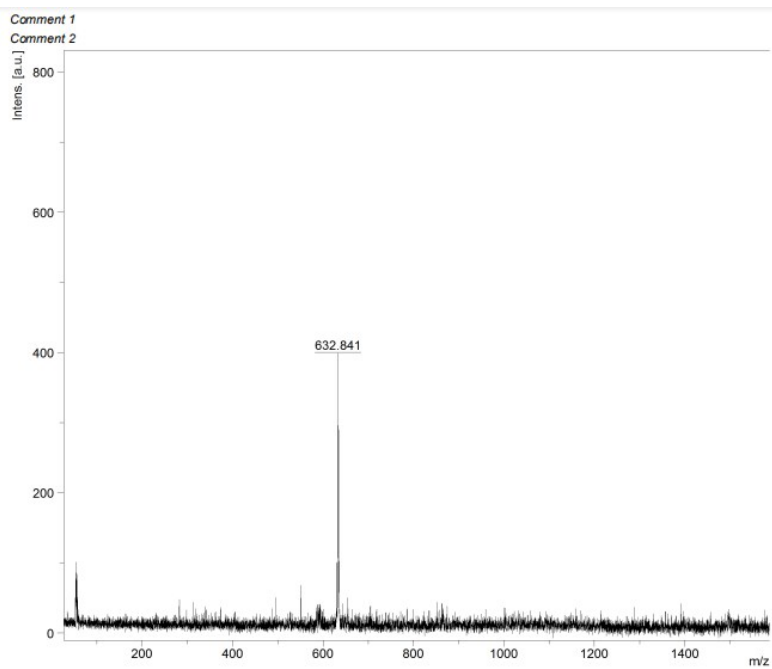

**Figure S20.** MS spectra of T2.
